# Supplementary material
Source: Springer Nature journal article supplement (http://www.springermedizin.de/resource/supplementary/12935_2008_225_MOESM5_ESM.pdf/9541354)

**Untreated**

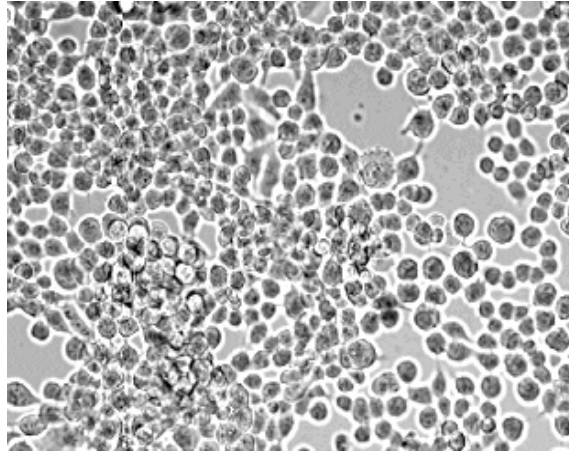

**DMSO**

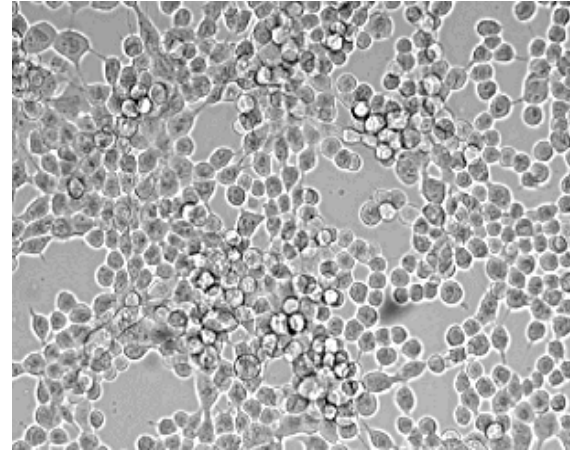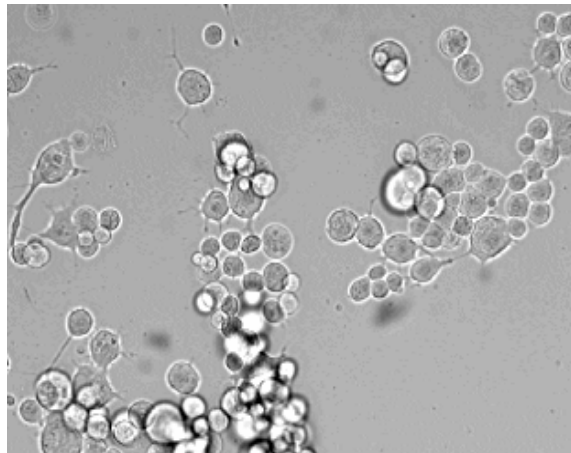

**10uM BITC**

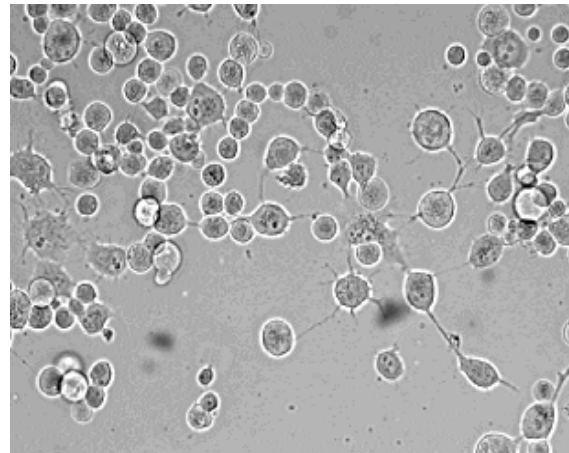

**10uM Sulforaphane**

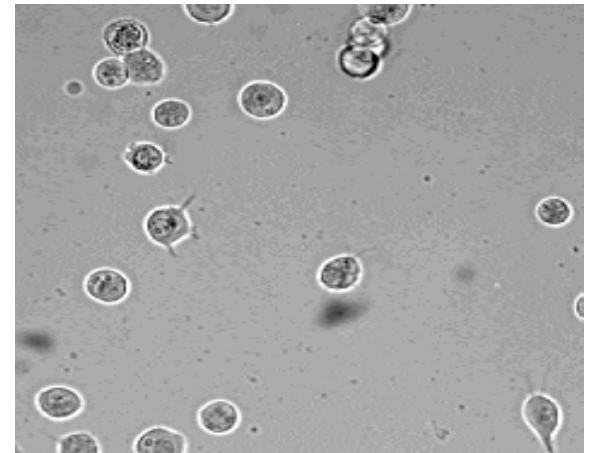

**BITC (10uM)+Sulforaphane (10uM)**

Supplement: MOESM5 [file 9541354]
